# Supplementary material for: Comparative Primary Metabolite Profiling of Setaria viridis Reveals Potential Markers to Water Limitation
Source: MDPI journal article supplement (doi:10.3390/agriculture13030660), 2023-03-11
Supplement: s1 [file s1]

## Water limitation induces organ-specific changes in the metabolite profile of *Setaria viridis*

### Supplemental figures and tables

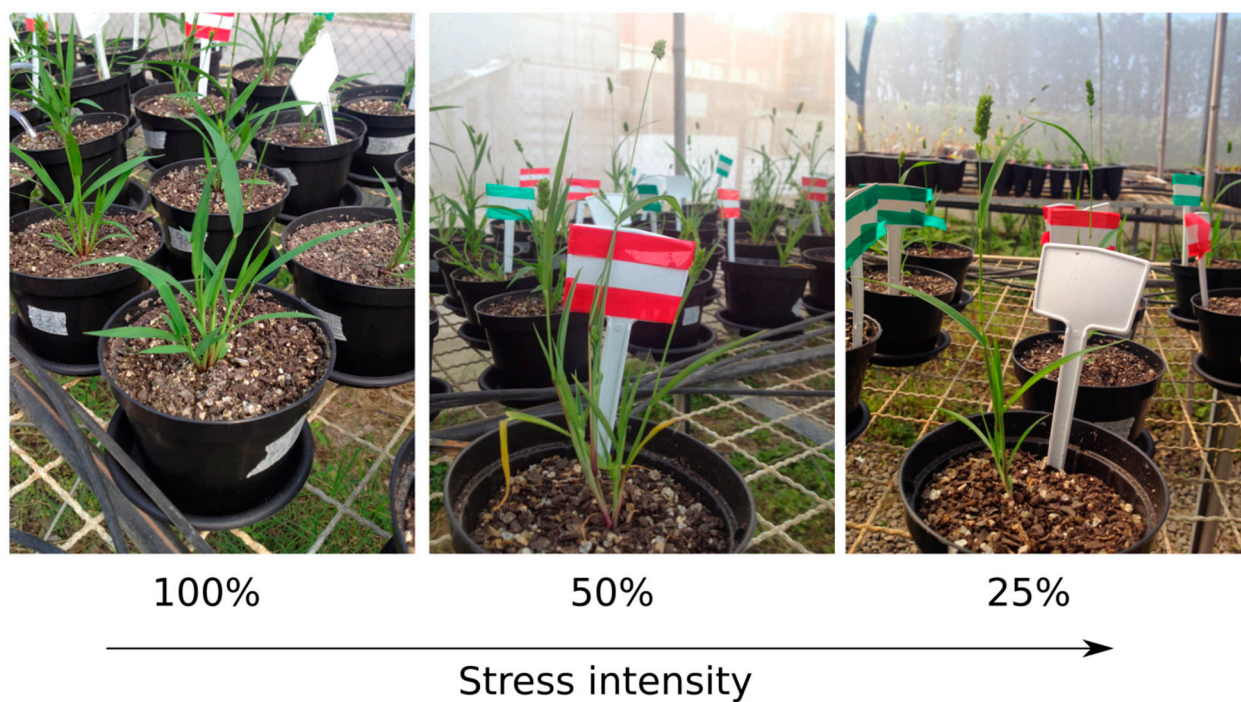

**Supplemental Figure S1** Representative plants of each treatment: no flag – 100% SPC (control); red flag – 50% SPC; white flag – 25% SPC

**a**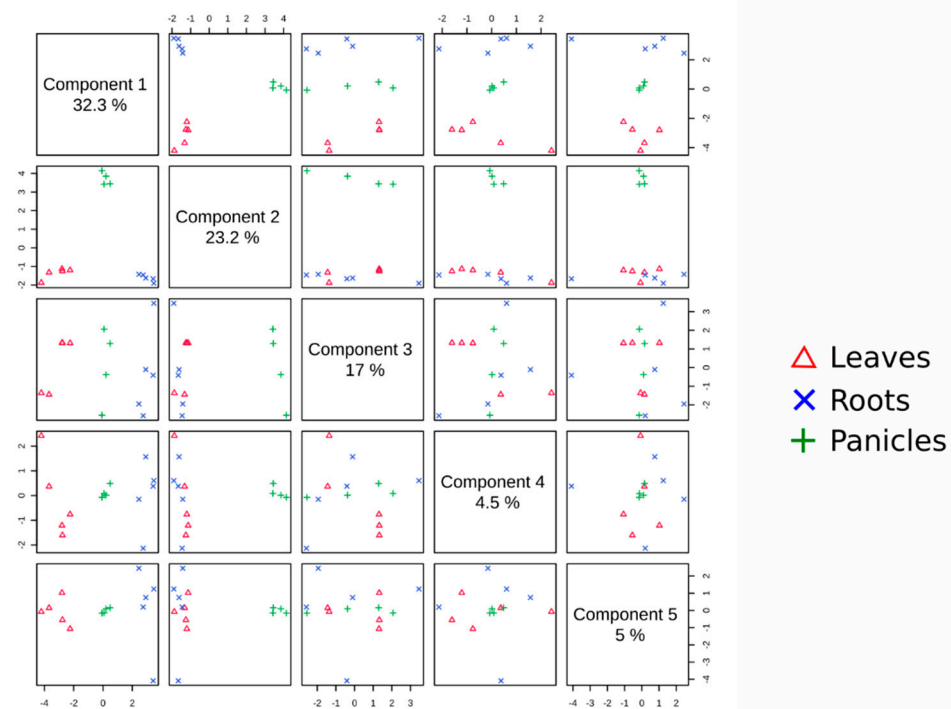**b**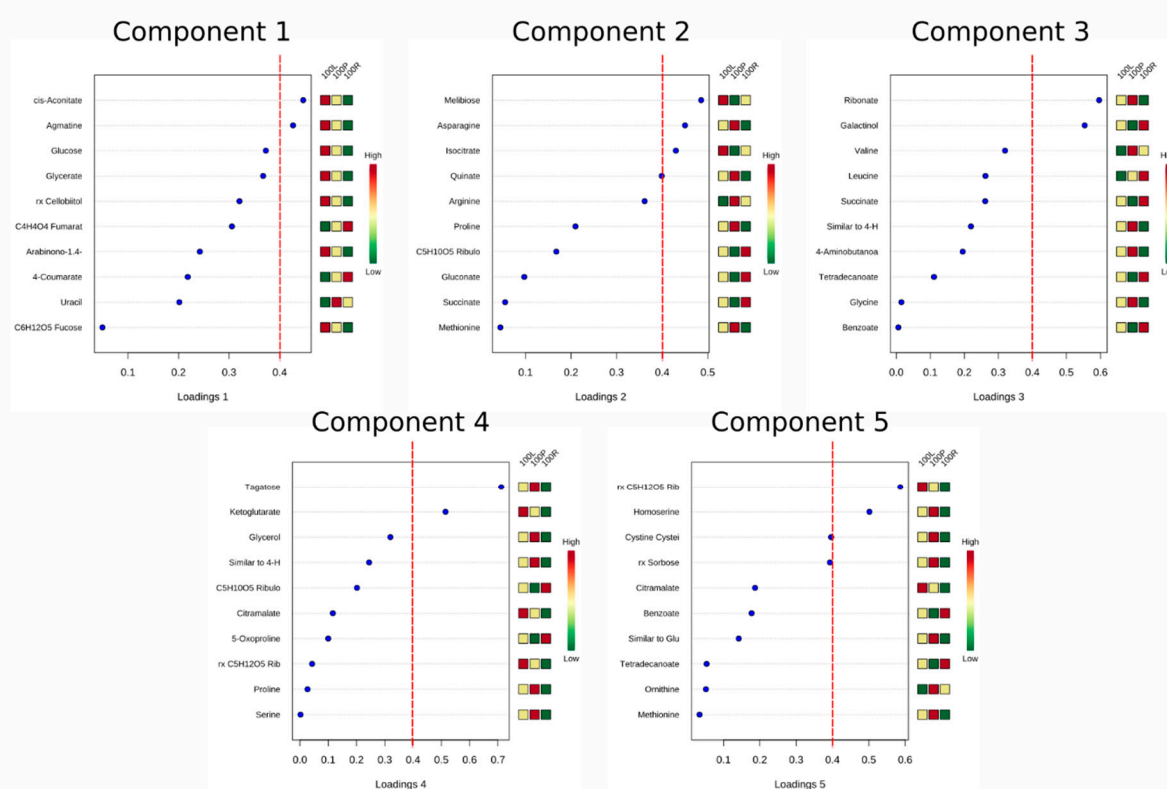

**Supplemental Figure S2** Discriminant analysis of metabolites in well-watered *S. viridis* panicles, leaves and roots. Five sPLS-DA components (a) and respective metabolites of each component (b). In panel B, the x-axis shows the loading score and dashed red line indicates the threshold (0.40) used to define the most important metabolites

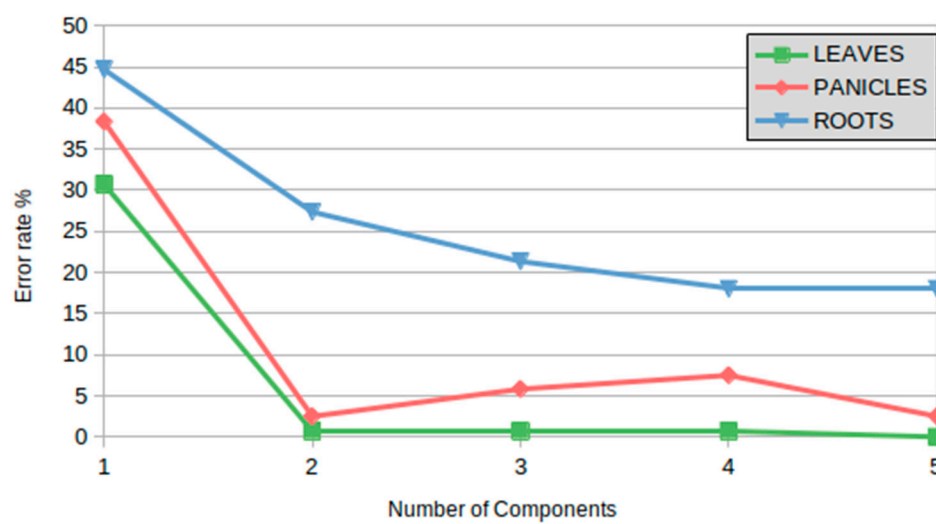

**Supplemental Figure S3** The 5-fold cross-validation of sPLS-DA analysis of panicles, leaves and roots with five components and 10 variables/component. The classification error rate corresponds to the average of 10 repetitions

## Panicles

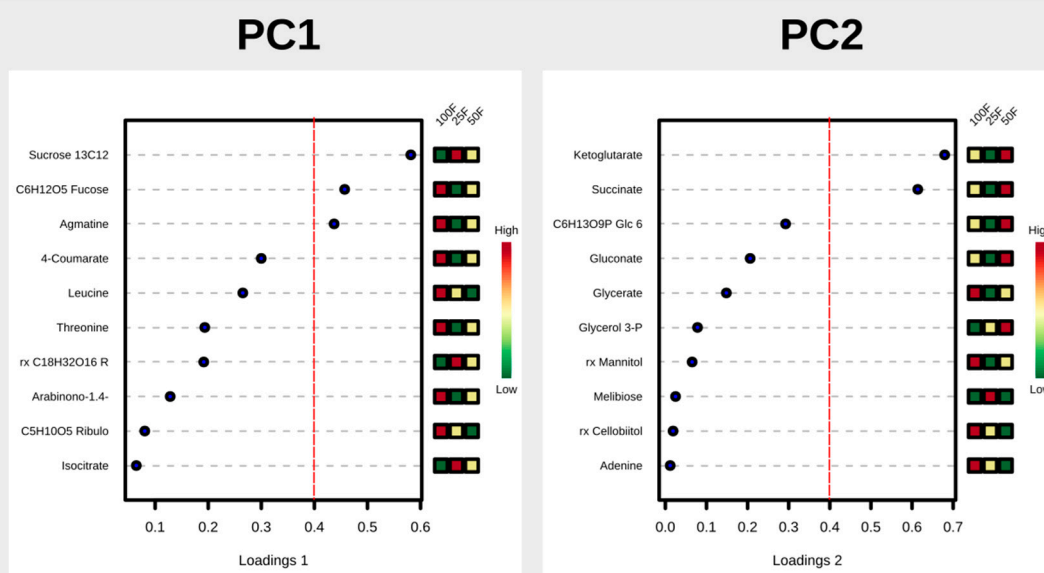

## Leaves

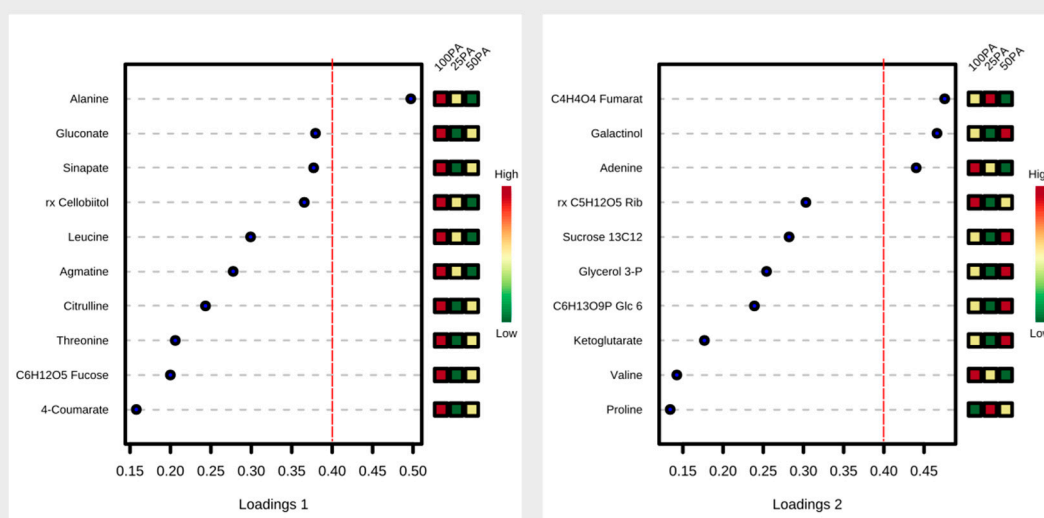

## Roots

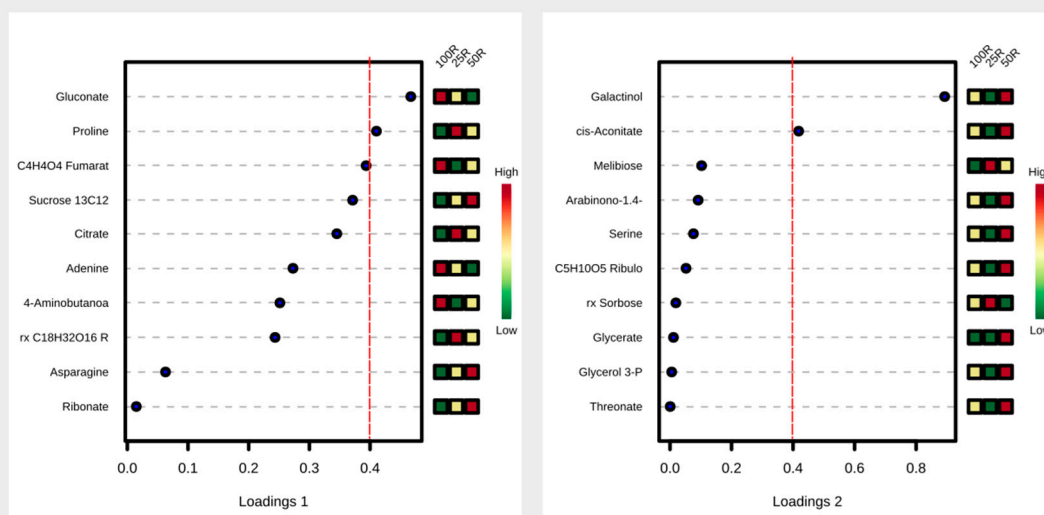

**Supplemental Figure S4** Important features (metabolites) for PC1 and PC2 of *S. viridis* panicles, leaves and roots

**Supplemental Table S1** Content of all metabolites (61) identified for panicles (P), leaves (L), and roots (R) of *S. viridis* plants submitted to three different water treatments: 100% (control), 50% and 25% of soil pot capacity (SPC). Highlighted metabolites correspond to the 36 most important shown in the Figure 2. Content values are the average of four biological replicates followed by the standard deviation. NA means no detectable values. The table is supplied as Microsoft Excel® sheet.

**Supplemental Table S2** The metabolites with absolute loading score > 0.40 for the five components of panicles, leaves and roots sPLS-DA analysis.

|          | Metabolites                                | Loading values |        |        |        |        |
|----------|--------------------------------------------|----------------|--------|--------|--------|--------|
|          |                                            | comp 1         | comp 2 | comp 3 | comp 4 | comp 5 |
| Leaves   | Tagatose                                   | 0.00           | 0.00   | -0.08  | 0.00   | -0.47  |
|          | rx Mannitol                                | 0.00           | 0.00   | 0.00   | -0.41  | 0.00   |
|          | cis-Aconitate                              | 0.00           | 0.00   | -0.41  | 0.00   | 0.00   |
|          | Galactinol                                 | 0.00           | -0.47  | 0.00   | 0.00   | 0.00   |
|          | Alanine                                    | -0.50          | 0.00   | 0.00   | 0.00   | 0.00   |
|          | Gluconate                                  | -0.38          | 0.00   | 0.00   | 0.00   | 0.00   |
|          | Sinapate                                   | -0.38          | 0.00   | 0.00   | 0.00   | 0.00   |
|          | rx Cellobiitol                             | -0.37          | 0.00   | 0.00   | 0.00   | 0.00   |
|          | Adenine                                    | 0.00           | 0.44   | 0.00   | 0.00   | 0.00   |
|          | rx C18H32O16 Raffinose1-KestoseInulotriose | 0.00           | 0.00   | 0.71   | 0.00   | 0.00   |
|          | Ribonate                                   | 0.00           | 0.00   | 0.00   | 0.38   | 0.00   |
|          | Quinate                                    | 0.00           | 0.00   | 0.00   | 0.38   | 0.00   |
|          | Cystine Cysteine                           | 0.00           | 0.00   | 0.00   | 0.39   | 0.00   |
|          | Succinate                                  | 0.00           | 0.00   | 0.00   | 0.40   | 0.00   |
|          | Homoserine                                 | 0.00           | 0.00   | 0.00   | 0.42   | 0.00   |
|          | C4H4O4 FumarateMaleate                     | 0.00           | 0.48   | 0.26   | 0.00   | 0.04   |
|          | rx Sorbose                                 | 0.00           | 0.00   | 0.00   | 0.00   | 0.37   |
|          | Asparagine                                 | 0.00           | 0.00   | 0.00   | 0.00   | 0.43   |
|          | Citramalate                                | 0.00           | 0.00   | 0.00   | 0.00   | 0.43   |
| Panicles | rx Sorbose                                 | 0.00           | 0.00   | 0.00   | 0.00   | -0.46  |
|          | C6H13O9P Glc 6-PGal 6-P                    | 0.00           | -0.25  | 0.00   | 0.00   | -0.38  |
|          | Glycerol                                   | 0.00           | 0.00   | 0.00   | -0.56  | 0.00   |
|          | Similar to 4-Hydroxypyridine               | 0.00           | 0.00   | 0.00   | -0.51  | 0.00   |
|          | Homoserine                                 | 0.00           | 0.00   | 0.00   | -0.48  | 0.00   |

|       |                                            |       |       |       |       |       |
|-------|--------------------------------------------|-------|-------|-------|-------|-------|
| Roots | rx Cellobiitol                             | 0.00  | 0.01  | -0.49 | 0.00  | 0.00  |
|       | C4H4O4 FumarateMaleate                     | 0.00  | 0.00  | -0.48 | 0.00  | 0.00  |
|       | Ketoglutarate                              | 0.00  | -0.69 | 0.00  | 0.00  | 0.00  |
|       | Succinate                                  | 0.00  | -0.62 | 0.00  | 0.00  | 0.00  |
|       | C6H12O5 FucoseEpifucose                    | -0.46 | 0.00  | 0.00  | 0.00  | 0.00  |
|       | Agmatine                                   | -0.44 | 0.00  | 0.00  | 0.00  | 0.00  |
|       | Sucrose 13C12                              | 0.59  | 0.00  | 0.00  | 0.00  | 0.00  |
|       | rx C5H12O5 RibitolArabitol                 | 0.00  | 0.00  | 0.00  | 0.00  | 0.35  |
|       | Galactinol                                 | 0.00  | 0.00  | -0.38 | 0.00  | 0.46  |
|       | Tetradecanoate                             | 0.00  | 0.00  | 0.00  | 0.00  | 0.51  |
|       |                                            |       |       |       |       |       |
|       | Arginine                                   | 0.00  | 0.00  | 0.00  | 0.00  | -0.54 |
|       | Isoleucine                                 | 0.00  | 0.00  | 0.00  | 0.00  | -0.44 |
|       | Valine                                     | 0.00  | 0.00  | 0.00  | 0.00  | -0.38 |
|       | rx C18H32O16 Raffinose1-KestoseInulotriose | 0.22  | 0.00  | 0.00  | -0.54 | 0.00  |
|       | Sinapate                                   | 0.00  | 0.00  | 0.00  | -0.49 | 0.00  |
|       | Uracil                                     | 0.00  | 0.00  | 0.00  | -0.37 | 0.00  |
|       | Gluconate                                  | -0.47 | 0.00  | 0.00  | 0.00  | 0.00  |
|       | C4H4O4 FumarateMaleate                     | -0.40 | 0.00  | 0.00  | 0.00  | 0.00  |
|       | Sucrose 13C12                              | 0.37  | 0.00  | 0.00  | 0.00  | 0.00  |
|       | Proline                                    | 0.42  | 0.00  | 0.00  | 0.00  | 0.00  |
|       | cis-Aconitate                              | 0.00  | 0.42  | 0.00  | 0.00  | 0.00  |
|       | Galactinol                                 | 0.00  | 0.89  | 0.00  | 0.00  | 0.00  |
|       | Orthophosphate                             | 0.00  | 0.00  | 0.45  | 0.00  | 0.00  |
|       | Agmatine                                   | 0.00  | 0.00  | 0.84  | 0.00  | 0.00  |
|       | Glucose                                    | 0.00  | 0.00  | 0.00  | -0.06 | 0.40  |

---

**Supplemental Table S3** Important features (metabolites) of PC1 and PC2 of *S. viridis* panicles, leaves and roots corresponding to Venn Diagram shown in **Figure 3**.

| Tissue<br>P    | TissueL        | TissueR         | TissueP Tissu<br>eL | TissueP Tissu<br>eR | TissueL Tissu<br>eR | TissueP TissueL Tissu<br>eR |
|----------------|----------------|-----------------|---------------------|---------------------|---------------------|-----------------------------|
| isocitrat<br>e | alanine        | citrate         | fucose              | C18H32O16           | fumarate            | sucrose                     |
| succinat<br>e  | sinapate       | aminobuta<br>no | agmatine            | arabinono           | galactinol          | gluconate                   |
| mannito<br>l   | citrullin<br>e | asaparagin<br>e | 4-coumarate         | C5H10O5             | proline             | glycerol 3-P                |
|                | C5H12<br>O5    | ribonate        | leucine             | glycerate           |                     | adenine                     |
|                | valine         | aconitate       | threonine           | melibiose           |                     |                             |
|                |                | serine          | ketoglutarate       |                     |                     |                             |
|                |                | sorbose         | C6H13O9P            |                     |                     |                             |
|                |                | threonate       | cellobiitol         |                     |                     |                             |
